# Supplementary material
Source: Research Square preprint supplement (doi:10.21203/rs.3.rs-9295411/v1)
Supplement: Supplementary file 1 [file 360ef115b61dddea1d01ffe8.docx]

List of Keywords/terms used to collect data

"prescribed burn" OR "prescribed fire" OR “rx fire" OR "rx burn" OR “(fire AND wui)” OR "fire ecology" OR “(fire AND adaptation)” OR “(fire AND fuels treatment)” OR “(fire AND fuel treatment)” OR “(fire AND air quality)” OR “(fire AND controlled burn)” OR “(fire AND defensible space)” OR "wildfire" OR "wildland urban interface" OR "forest fire" OR “(wildfire AND vegetation)” OR “(fuels AND forest)” OR “(wildfire AND fuel break)” OR “(wildfire AND cwpp)” OR "community wildfire protection plan" OR "firewise" OR "fire-adapted communities" OR “(fire AND thinning)” OR “(fire AND mastication)” OR “(fire AND grazing)” OR “(fire AND indigenous land management practices)” OR "fire adapted ecosystems" OR "fire-adapted ecosystems" OR "fuel ladder management" OR "wildfire risk reduction" OR "fire behavior" OR “(fire AND management)” OR “(fire AND suppression)” OR “(fire AND community outreach)” OR “(fire AND community)” OR “(fire AND homeowner mitigation)” OR “(fire AND nfs land)” OR “(fire AND national forest service land)” OR “(fire AND nf)” OR “(fire AND national forest)” OR “(fire AND wcs)” OR “wildfire crisis strategy” OR “(fire AND forest service)” OR “(fire AND usfs)” OR “fire district” OR “(fire AND forest restoration)” OR “(fire AND nepa)” OR “(fire AND national environmental policy act)” OR “(fire AND environmental impact statement)” OR “(fire AND eis)” OR “(fire AND environmental assessment)” OR “(fire AND dnr)” OR “(fire AND department of natural resources)” OR “(fire AND department of forestry)” OR “(fire AND forestry)” OR “(fire AND fac)” OR “(fire AND cwdg)” OR “community wildfire defense plan” OR “(fire AND priority landscapes)” OR “(fire AND pod)” OR “(fire AND pod boundaries)” OR “(fire AND potential operational delineations)” OR “(fire AND cwi)” OR “(climate and wildfire institute)” OR “climate & wildfire institute” OR “(fire AND administrative barriers)” OR “(fire AND regulatory)” OR “(fire AND lsr)” OR “(fire AND landscape scale restoration)” OR “(fire AND stewardship)” OR “(fire AND tribal land)” OR “(fire AND tribal)” OR “(fire AND sp&t)” OR “(fire AND state, private, and tribal)” OR “(fire AND spf)” OR “(fire AND state and private)” OR “wildfire hazard mitigation” OR “(fire AND mitigation)” OR “(fire AND fema)” OR “(fire AND federal emergency management agency)” OR “(fire AND silviculture)” OR “(fire AND forestry)” OR “(fire AND resilience)” OR “department of forestry and fire protection” OR “cal fire” OR “(fire AND department of lands)” OR “(fire AND idl)” OR “(fire AND department of natural resources and conservation)” OR “(fire AND dnrc)” OR “department of forestry and fire management” OR “(fire AND dffm)” OR “(fire AND energy, minerals, and natural resources department)” OR “(fire AND emnrd)” OR “cultural burn”
